# Supplementary material for: The epidemiology of cardiovascular disease in the UK 2014
Source: HighWire-hosted journal article supplement (doi:10.1136/heartjnl-2015-307516), 2015-06-03
Supplement: heartjnl-2015-307516supp.pdf [file heartjnl-2015-307516supp.pdf]

# The epidemiology of cardiovascular disease in the UK 2014 - Supplementary files

|                                                                                                                                                                                                                |    |
|----------------------------------------------------------------------------------------------------------------------------------------------------------------------------------------------------------------|----|
| Table 1 Deaths by cause, sex and age, United Kingdom 2012.....                                                                                                                                                 | 2  |
| Table 2 Deaths by cause, by sex and age, England, Wales, Scotland, Northern Ireland and United Kingdom 2012 .....                                                                                              | 6  |
| Table 3 Numbers of deaths and age-standardised death rates from cardiovascular disease (CVD) in men and women, all ages and under 75, by government office region, United Kingdom 2010/12 .....                | 10 |
| Table 4 Numbers of deaths and age-standardised death rates from coronary heart disease (CHD) in men and women, all ages and under 75, by government office region, United Kingdom 2010/12 .....                | 12 |
| Table 5 Numbers of deaths and age-standardised death rates from stroke in men and women, all ages and under 75, by government office region, United Kingdom 2010/12.....                                       | 14 |
| Table 6 Rankings for ten local authorities with highest coronary heart disease mortality rates and ten local authorities with the lowest coronary heart disease mortality rates, United Kingdom 2010/2012..... | 16 |
| Table 7 Rankings for ten local authorities with highest stroke mortality rates and ten local authorities with the lowest stroke mortality rates, United Kingdom 2010/2012 .....                                | 18 |
| Table 8 Prevalence of selected cardiovascular conditions by Government Office Region and country, United Kingdom 2012/13 .....                                                                                 | 20 |
| Table 9 Prescriptions used in the prevention and treatment of cardiovascular disease, Wales 2005 to 2013 .....                                                                                                 | 21 |
| Table 10 Prescriptions used in the prevention and treatment of cardiovascular disease, Scotland 2001/02 to 2013/14 .....                                                                                       | 22 |
| Table 11 Prescriptions used in the prevention and treatment of cardiovascular disease, Northern Ireland 2000 to 2013.....                                                                                      | 23 |
| Table 12 Number of CABGs and PCIs, United Kingdom 1977 to 2012.....                                                                                                                                            | 24 |
| Table 13 Number of carotid endarterectomy cases reported in Hospital Episodes Statistics, by audit reporting period, Strategic Health Authority and country, United Kingdom 2005 to 2012.....                  | 25 |
| Table 14 NHS expenditure in £millions on CVD by care setting and CVD type, England 2012/13 .....                                                                                                               | 26 |
| Table 15 NHS expenditure on CVD by Health Board, Wales 2012/13 .....                                                                                                                                           | 27 |
| Table 16 NHS expenditure on CVD by Health and Social Care Trust, Northern Ireland 2012/13.....                                                                                                                 | 28 |

Table 1 Deaths by cause, sex and age, United Kingdom 2012.

|                                                         |              | All ages       | Under 35 | 35-44  | 45-54  | 55-64  | 65-74  | 75-84   | 85+     |
|---------------------------------------------------------|--------------|----------------|----------|--------|--------|--------|--------|---------|---------|
| <b>All causes</b>                                       | MEN          | 273,347        | 7,452    | 6,279  | 13,625 | 28,214 | 54,073 | 86,332  | 77,372  |
|                                                         | WOMEN        | 295,677        | 4,235    | 3,726  | 9,449  | 19,534 | 38,960 | 81,794  | 137,979 |
|                                                         | <b>Total</b> | 569,024        | 11,687   | 10,005 | 23,074 | 47,748 | 93,033 | 168,126 | 215,351 |
| <b>All diseases of the circulatory system (I00-I99)</b> | MEN          | 79,050         | 476      | 1,163  | 3,603  | 7,631  | 15,224 | 26,349  | 24,604  |
|                                                         | WOMEN        | 82,202         | 247      | 518    | 1,351  | 3,141  | 8,388  | 24,058  | 44,499  |
|                                                         | <b>Total</b> | <b>161,252</b> | 723      | 1,681  | 4,954  | 10,772 | 23,612 | 50,407  | 69,103  |
| Chronic rheumatic heart diseases (I05-I09)              | MEN          | 381            | 2        | 5      | 12     | 35     | 66     | 145     | 116     |
|                                                         | WOMEN        | 850            | 4        | 6      | 17     | 41     | 118    | 324     | 340     |
|                                                         | <b>Total</b> | <b>1,231</b>   | 6        | 11     | 29     | 76     | 184    | 469     | 456     |
| Hypertensive diseases (I10-I15)                         | MEN          | 2,275          | 10       | 44     | 121    | 257    | 437    | 691     | 715     |
|                                                         | WOMEN        | 3,267          | 4        | 14     | 50     | 135    | 351    | 832     | 1,881   |
|                                                         | <b>Total</b> | <b>5,542</b>   | 14       | 58     | 171    | 392    | 788    | 1,523   | 2,596   |
| Coronary heart disease (I20-I25)                        | MEN          | 42,819         | 119      | 596    | 2,250  | 5,033  | 9,256  | 14,129  | 11,436  |
|                                                         | WOMEN        | 30,861         | 27       | 151    | 505    | 1,383  | 3,770  | 9,537   | 15,488  |
|                                                         | <b>Total</b> | <b>73,680</b>  | 146      | 747    | 2,755  | 6,416  | 13,026 | 23,666  | 26,924  |
| Other heart diseases (I26-I52)                          | MEN          | 10,614         | 221      | 236    | 489    | 778    | 1,516  | 3,162   | 4,212   |
|                                                         | WOMEN        | 15,195         | 119      | 137    | 223    | 451    | 1,176  | 3,880   | 9,209   |

|                                                                                               |              |                |              |              |              |               |               |               |               |
|-----------------------------------------------------------------------------------------------|--------------|----------------|--------------|--------------|--------------|---------------|---------------|---------------|---------------|
|                                                                                               | <b>Total</b> | <b>25,809</b>  | 340          | 373          | 712          | 1,229         | 2,692         | 7,042         | 13,421        |
| Stroke<br>(I60-I69)                                                                           | MEN          | 16,196         | 80           | 174          | 477          | 934           | 2,438         | 5,774         | 6,319         |
|                                                                                               | WOMEN        | 25,202         | 56           | 131          | 394          | 824           | 2,073         | 7,100         | 14,624        |
|                                                                                               | <b>Total</b> | <b>41,398</b>  | 136          | 305          | 871          | 1,758         | 4,511         | 12,874        | 20,943        |
| Diseases of arteries,<br>arterioles and capillaries<br>(I70-I79)                              | MEN          | 5,367          | 19           | 47           | 129          | 345           | 1,160         | 2,075         | 1,592         |
|                                                                                               | WOMEN        | 4,790          | 11           | 18           | 48           | 134           | 582           | 1,713         | 2,284         |
|                                                                                               | <b>Total</b> | <b>10,157</b>  | 30           | 65           | 177          | 479           | 1,742         | 3,788         | 3,876         |
| Diseases of veins, lymphatic<br>vessels and lymph nodes not<br>classified elsewhere (I80-I89) | MEN          | 1,380          | 25           | 61           | 125          | 248           | 350           | 371           | 200           |
|                                                                                               | WOMEN        | 2,013          | 25           | 61           | 114          | 173           | 318           | 667           | 655           |
|                                                                                               | <b>Total</b> | <b>3,393</b>   | 50           | 122          | 239          | 421           | 668           | 1,038         | 855           |
| <b>Cancer<br/>(C00-D48)</b>                                                                   | MEN          | 87,061         | 654          | 1,045        | 4,026        | 12,195        | 23,739        | 29,070        | 16,332        |
|                                                                                               | WOMEN        | 78,757         | 710          | 1,491        | 4,838        | 10,653        | 18,402        | 24,099        | 18,564        |
|                                                                                               | <b>Total</b> | <b>165,818</b> | <b>1,364</b> | <b>2,536</b> | <b>8,864</b> | <b>22,848</b> | <b>42,141</b> | <b>53,169</b> | <b>34,896</b> |
| Colo-rectal cancer<br>(C18-C21)                                                               | MEN          | 8,918          | 32           | 115          | 447          | 1,288         | 2,295         | 3,051         | 1,690         |
|                                                                                               | WOMEN        | 7,594          | 51           | 110          | 361          | 850           | 1,493         | 2,413         | 2,316         |
|                                                                                               | <b>Total</b> | <b>16,512</b>  | <b>83</b>    | <b>225</b>   | <b>808</b>   | <b>2,138</b>  | <b>3,788</b>  | <b>5,464</b>  | <b>4,006</b>  |
| Lung cancer<br>(C33,C34)                                                                      | MEN          | 19,333         | 13           | 129          | 781          | 3,100         | 6,238         | 6,392         | 2,680         |
|                                                                                               | WOMEN        | 16,086         | 17           | 108          | 698          | 2,520         | 4,762         | 5,251         | 2,730         |
|                                                                                               | <b>Total</b> | <b>35,419</b>  | <b>30</b>    | <b>237</b>   | <b>1,479</b> | <b>5,620</b>  | <b>11,000</b> | <b>11,643</b> | <b>5,410</b>  |



|                         |              |                |       |       |       |       |        |        |        |
|-------------------------|--------------|----------------|-------|-------|-------|-------|--------|--------|--------|
| <b>All other causes</b> | MEN          | 50,134         | 5,973 | 3,732 | 5,104 | 5,607 | 6,985  | 11,085 | 11,648 |
|                         | WOMEN        | 54,397         | 3,008 | 1,480 | 2,631 | 3,563 | 5,572  | 12,306 | 25,837 |
|                         | <b>Total</b> | <b>113,390</b> | 8,981 | 5,212 | 7,747 | 9,290 | 13,096 | 26,135 | 42,929 |

Notes: ICD-10 codes in parentheses. This table compiles data from the four countries of the UK. In Northern Ireland, the data for Lung Cancer only includes ICD-10 code C34.

Source: England and Wales, Office for National Statistics (2014) Deaths registered by cause, sex and age. [www.statistics.gov.uk](http://www.statistics.gov.uk) (accessed January 2014); Scotland, National Records of Scotland (2014) Deaths, by sex, age and cause. [www.gro-scotland.gov.uk](http://www.gro-scotland.gov.uk) (accessed January 2014); Northern Ireland, Statistics and Research Agency (2014) Registrar General Annual Report. NISRA: Belfast.

Table 2 Deaths by cause, by sex and age, England, Wales, Scotland, Northern Ireland and United Kingdom 2012

|                                                                 |              | All ages       |               |               |                     |                   | Under 75       |               |               |                     |                   |
|-----------------------------------------------------------------|--------------|----------------|---------------|---------------|---------------------|-------------------|----------------|---------------|---------------|---------------------|-------------------|
|                                                                 |              | England        | Wales         | Scotland      | Northern<br>Ireland | United<br>Kingdom | England        | Wales         | Scotland      | Northern<br>Ireland | United<br>Kingdom |
| <b>All causes</b>                                               | MEN          | 224,460        | 15,172        | 26,015        | 7,094               | 273,347           | 87,986         | 6,132         | 11,938        | 3,140               | 109,643           |
|                                                                 | WOMEN        | 242,319        | 16,330        | 28,922        | 7,662               | 295,677           | 60,721         | 4,298         | 8,508         | 2,090               | 75,904            |
|                                                                 | <b>Total</b> | <b>466,779</b> | <b>31,502</b> | <b>54,937</b> | <b>14,756</b>       | <b>569,024</b>    | <b>148,707</b> | <b>10,430</b> | <b>20,446</b> | <b>5,230</b>        | <b>85,547</b>     |
| <b>All diseases of the<br/>circulatory system<br/>(I00-I99)</b> | MEN          | 64,659         | ,608          | 7,610         | 1,924               | 79,050            | 22,437         | 1,614         | 3,127         | 748                 | 28,097            |
|                                                                 | WOMEN        | 67,000         | 4,688         | 8,279         | 2,077               | 82,202            | 10,821         | 807           | 1,610         | 320                 | 13,645            |
|                                                                 | <b>Total</b> | <b>131,659</b> | <b>9,296</b>  | <b>15,889</b> | <b>4,001</b>        | <b>161,252</b>    | <b>33,258</b>  | <b>2,421</b>  | <b>4,737</b>  | <b>1,068</b>        | <b>41,742</b>     |
| Chronic rheumatic heart<br>diseases<br>(I05-I09)                | MEN          | 329            | 19            | 26            | 4                   | 381               | 97             | 9             | 10            | 3                   | 120               |
|                                                                 | WOMEN        | 697            | 60            | 72            | 17                  | 850               | 140            | 13            | 26            | 5                   | 186               |
|                                                                 | <b>Total</b> | <b>1,026</b>   | <b>79</b>     | <b>98</b>     | <b>21</b>           | <b>1,231</b>      | <b>237</b>     | <b>22</b>     | <b>36</b>     | <b>8</b>            | <b>306</b>        |
| Hypertensive diseases<br>(I10-I15)                              | MEN          | 1,895          | 126           | 207           | 38                  | 2,275             | 692            | 53            | 101           | 16                  | 869               |
|                                                                 | WOMEN        | 2,740          | 187           | 265           | 68                  | 3,267             | 461            | 28            | 55            | 7                   | 554               |
|                                                                 | <b>Total</b> | <b>4,635</b>   | <b>313</b>    | <b>472</b>    | <b>106</b>          | <b>5,542</b>      | <b>1,153</b>   | <b>81</b>     | <b>156</b>    | <b>23</b>           | <b>1,423</b>      |
| Coronary heart disease<br>(I20-I25)                             | MEN          | 34,726         | 2,554         | 4,258         | 1,138               | 42,819            | 13,638         | 995           | 2,015         | 500                 | 17,254            |
|                                                                 | WOMEN        | 24,904         | 1,776         | 3,283         | 837                 | 30,861            | 4,509          | 388           | 738           | 163                 | 5,836             |
|                                                                 | <b>Total</b> | <b>59,630</b>  | <b>4,330</b>  | <b>7,541</b>  | <b>1,975</b>        | <b>73,680</b>     | <b>18,147</b>  | <b>1,383</b>  | <b>2,753</b>  | <b>663</b>          | <b>23,090</b>     |

|                                                                                             |              |                |              |               |              |                |               |              |              |              |               |
|---------------------------------------------------------------------------------------------|--------------|----------------|--------------|---------------|--------------|----------------|---------------|--------------|--------------|--------------|---------------|
| Other heart diseases<br>(I26-I52)                                                           | MEN          | 8,851          | 602          | 903           | 237          | 10,614         | 2,641         | 175          | 330          | 83           | 3,240         |
|                                                                                             | WOMEN        | 12,624         | 861          | 1,316         | 366          | 15,195         | 1,729         | 106          | 223          | 36           | 2,106         |
|                                                                                             | <b>Total</b> | <b>21,475</b>  | <b>1,463</b> | <b>2,219</b>  | <b>603</b>   | <b>25,809</b>  | <b>4,370</b>  | <b>281</b>   | <b>553</b>   | <b>119</b>   | <b>5,346</b>  |
| <hr/>                                                                                       |              |                |              |               |              |                |               |              |              |              |               |
| Stroke<br>(I60-I69)                                                                         | MEN          | 13,145         | 929          | 1,686         | 394          | 16,196         | 3,248         | 261          | 463          | 106          | 4,103         |
|                                                                                             | WOMEN        | 20,312         | 1,381        | 2,789         | 683          | 25,202         | 2,751         | 189          | 433          | 81           | 3,478         |
|                                                                                             | <b>Total</b> | <b>33,457</b>  | <b>2,310</b> | <b>4,475</b>  | <b>1,077</b> | <b>41,398</b>  | <b>5,999</b>  | <b>450</b>   | <b>896</b>   | <b>187</b>   | <b>7,581</b>  |
| <hr/>                                                                                       |              |                |              |               |              |                |               |              |              |              |               |
| Diseases of arteries,<br>arterioles and capillaries<br>(I70-I79)                            | MEN          | 4,480          | 308          | 457           | 98           | 5,367          | 1,419         | 85           | 155          | 27           | 1,700         |
|                                                                                             | WOMEN        | 3,908          | 304          | 471           | 89           | 4,790          | 634           | 44           | 91           | 16           | 793           |
|                                                                                             | <b>Total</b> | <b>8,388</b>   | <b>612</b>   | <b>928</b>    | <b>187</b>   | <b>10,157</b>  | <b>2,053</b>  | <b>129</b>   | <b>246</b>   | <b>43</b>    | <b>2,493</b>  |
| <hr/>                                                                                       |              |                |              |               |              |                |               |              |              |              |               |
| Diseases of veins,<br>lymphatic<br>vessels and lymph<br>nodes*<br>(I80-I89)                 | MEN          | 1,217          | 70           | 71            | 15           | 1,380          | 701           | 36           | 52           | 13           | 809           |
|                                                                                             | WOMEN        | 1,794          | 119          | 80            | 17           | 2,013          | 596           | 39           | 44           | 12           | 691           |
|                                                                                             | <b>Total</b> | <b>3,011</b>   | <b>189</b>   | <b>151</b>    | <b>32</b>    | <b>3,393</b>   | <b>1,297</b>  | <b>75</b>    | <b>96</b>    | <b>25</b>    | <b>1,500</b>  |
| <hr/>                                                                                       |              |                |              |               |              |                |               |              |              |              |               |
| All other cardiovascular<br>conditions (I95-I99, I00-<br>I04, I16-I19, I53-I59,<br>I90-I94) | MEN          | 16             | 0            | 2             | 0            | 18             | 2             | 0            | 1            | 0            | 2             |
|                                                                                             | WOMEN        | 21             | 0            | 3             | 0            | 24             | 0             | 0            | 0            | 0            | 1             |
|                                                                                             | <b>Total</b> | <b>37</b>      | <b>0</b>     | <b>5</b>      | <b>0</b>     | <b>42</b>      | <b>2</b>      | <b>0</b>     | <b>1</b>     | <b>0</b>     | <b>3</b>      |
| <hr/>                                                                                       |              |                |              |               |              |                |               |              |              |              |               |
| <b>Cancer<br/>(C00-D48)</b>                                                                 | MEN          | 71,892         | 4,637        | 8,134         | 2,232        | 87,061         | 33,954        | 2,262        | 4,161        | 1,174        | 41,659        |
|                                                                                             | WOMEN        | 64,275         | 4,275        | 8,029         | 2,028        | 78,757         | 29,248        | 1,983        | 3,790        | 972          | 36,094        |
|                                                                                             | <b>Total</b> | <b>136,167</b> | <b>8,912</b> | <b>16,163</b> | <b>4,260</b> | <b>165,818</b> | <b>63,202</b> | <b>4,245</b> | <b>7,951</b> | <b>2,146</b> | <b>77,753</b> |





|                                                   |              |               |              |               |              |                |               |              |              |              |               |
|---------------------------------------------------|--------------|---------------|--------------|---------------|--------------|----------------|---------------|--------------|--------------|--------------|---------------|
| <b>Diabetes<br/>(E10-E14)</b>                     | MEN          | 2,188         | 150          | 407           | 86           | 3,625          | 754           | 53           | 195          | 27           | 1,524         |
|                                                   | WOMEN        | 2,428         | 156          | 347           | 88           | 4,013          | 487           | 33           | 115          | 22           | 1,110         |
|                                                   | <b>Total</b> | <b>4,616</b>  | <b>306</b>   | <b>754</b>    | <b>174</b>   | <b>7,638</b>   | <b>1,241</b>  | <b>86</b>    | <b>310</b>   | <b>49</b>    | <b>2,634</b>  |
| <hr/>                                             |              |               |              |               |              |                |               |              |              |              |               |
| <b>Dementia and Alzheimer's<br/>(F01-03, G30)</b> | MEN          | 13,154        | 823          | 1,385         | 435          | 15,804         | 987           | 71           | 133          | 51           | 1,243         |
|                                                   | WOMEN        | 28,033        | 1,836        | 3,224         | 985          | 34,082         | 1,026         | 90           | 156          | 46           | 1,318         |
|                                                   | <b>Total</b> | <b>41,187</b> | <b>2,659</b> | <b>4,609</b>  | <b>1,420</b> | <b>49,886</b>  | <b>2,013</b>  | <b>161</b>   | <b>289</b>   | <b>97</b>    | <b>2,561</b>  |
| <hr/>                                             |              |               |              |               |              |                |               |              |              |              |               |
| <b>All other causes</b>                           | MEN          | 41,290        | 2,788        | 5,246         | 1,440        | 50,134         | 21,961        | 1,568        | 3,323        | 2,332        | 27,401        |
|                                                   | WOMEN        | 45,805        | 2,938        | 5,108         | 1,438        | 54,397         | 13,228        | 944          | 1,902        | 1,983        | 16,254        |
|                                                   | <b>Total</b> | <b>87,095</b> | <b>5,726</b> | <b>10,354</b> | <b>2,878</b> | <b>113,390</b> | <b>35,189</b> | <b>2,512</b> | <b>5,225</b> | <b>4,315</b> | <b>44,326</b> |

Notes: ICD-10 codes in parentheses; \*Not classified elsewhere; This table compiles data from the four countries of the UK. In Northern Ireland, the data for Lung Cancer only includes ICD-10 code C34; The four countries in this table do not always add up to the United Kingdom totals, as the separate England and Wales figures are only for people who were residing in the country at the time of death; therefore the mortality figures for England and Wales separately are lower than the published mortality figures for England and Wales together.

Source: England and Wales, Office for National Statistics (2014) Deaths registered by cause, sex and age. [www.statistics.gov.uk](http://www.statistics.gov.uk) (accessed January 2014); Scotland, National Records of Scotland (2014) Deaths, by sex, age and cause. [www.gro-scotland.gov.uk](http://www.gro-scotland.gov.uk) (accessed January 2014); Northern Ireland, Statistics and Research Agency (2014) Registrar General Annual Report. NISRA: Belfast.

Table 3 Numbers of deaths and age-standardised death rates from cardiovascular disease (CVD) in men and women, all ages and under 75, by government office region, United Kingdom 2010/12

|                          | All ages                             |               |               |                                                     |               |                | Under 75                             |              |              |                                                     |               |               |
|--------------------------|--------------------------------------|---------------|---------------|-----------------------------------------------------|---------------|----------------|--------------------------------------|--------------|--------------|-----------------------------------------------------|---------------|---------------|
|                          | Age-standardised death rates/100,000 |               |               | Average numbers of CVD deaths per year 2010 to 2012 |               |                | Age-standardised death rates/100,000 |              |              | Average numbers of CVD deaths per year 2010 to 2012 |               |               |
|                          | Men                                  | Women         | Both          | Men                                                 | Women         | Both           | Men                                  | Women        | Both         | Men                                                 | Women         | Both          |
| <b>UK</b>                | <b>358.19</b>                        | <b>246.37</b> | <b>296.36</b> | <b>81,680</b>                                       | <b>84,541</b> | <b>166,222</b> | <b>109.18</b>                        | <b>48.68</b> | <b>77.98</b> | <b>29,423</b>                                       | <b>13,854</b> | <b>43,277</b> |
| <b>ENGLAND</b>           | <b>350.03</b>                        | <b>240.16</b> | <b>289.36</b> | <b>67,137</b>                                       | <b>69,253</b> | <b>136,391</b> | <b>105.51</b>                        | <b>46.59</b> | <b>75.17</b> | <b>23,714</b>                                       | <b>11,018</b> | <b>34,732</b> |
| North East               | 368.66                               | 248.55        | 301.74        | 3,599                                               | 3,567         | 7,166          | 119.00                               | 54.12        | 85.46        | 1,400                                               | 677           | 2,077         |
| Yorkshire and The Humber | 384.54                               | 258.60        | 314.12        | 7,299                                               | 7,376         | 14,675         | 118.71                               | 52.56        | 84.67        | 2,709                                               | 1,265         | 3,974         |
| North West               | 386.97                               | 266.93        | 320.51        | 9,798                                               | 10,036        | 19,834         | 124.89                               | 58.55        | 90.79        | 3,853                                               | 1,897         | 5,750         |
| East Midlands            | 354.93                               | 241.90        | 292.90        | 6,082                                               | 6,010         | 12,092         | 106.30                               | 47.74        | 76.48        | 2,180                                               | 1,005         | 3,185         |
| West Midlands            | 360.35                               | 239.94        | 293.61        | 7,391                                               | 7,360         | 14,751         | 109.90                               | 47.72        | 78.09        | 2,686                                               | 1,217         | 3,903         |
| East of England          | 332.26                               | 231.80        | 276.89        | 7,600                                               | 7,951         | 15,551         | 93.98                                | 41.70        | 67.11        | 2,445                                               | 1,139         | 3,584         |
| South East               | 323.53                               | 228.31        | 271.24        | 10,745                                              | 11,853        | 22,598         | 89.93                                | 38.77        | 63.54        | 3,370                                               | 1,532         | 4,902         |
| London                   | 337.45                               | 229.21        | 277.76        | 7,111                                               | 7,025         | 14,136         | 110.10                               | 47.58        | 77.34        | 2,799                                               | 1,296         | 4,096         |
| South West               | 324.96                               | 222.94        | 268.62        | 7,513                                               | 8,076         | 15,589         | 89.99                                | 37.20        | 62.81        | 2,271                                               | 990           | 3,261         |
| <b>WALES</b>             | <b>389.20</b>                        | <b>265.56</b> | <b>320.60</b> | <b>4,722</b>                                        | <b>4,860</b>  | <b>9,583</b>   | <b>117.61</b>                        | <b>55.39</b> | <b>85.65</b> | <b>1,680</b>                                        | <b>834</b>    | <b>2,514</b>  |
| <b>SCOTLAND</b>          | <b>416.58</b>                        | <b>292.39</b> | <b>347.31</b> | <b>7,791</b>                                        | <b>8,315</b>  | <b>16,106</b>  | <b>137.89</b>                        | <b>64.02</b> | <b>99.19</b> | <b>3,217</b>                                        | <b>1,633</b>  | <b>4,850</b>  |

|                         |               |              |              |              |              |              |               |              |              |            |            |              |
|-------------------------|---------------|--------------|--------------|--------------|--------------|--------------|---------------|--------------|--------------|------------|------------|--------------|
| <b>NORTHERN IRELAND</b> | <b>373.95</b> | <b>54.58</b> | <b>07.02</b> | <b>2,030</b> | <b>2,112</b> | <b>4,142</b> | <b>114.32</b> | <b>48.73</b> | <b>80.27</b> | <b>811</b> | <b>370</b> | <b>1,181</b> |
|-------------------------|---------------|--------------|--------------|--------------|--------------|--------------|---------------|--------------|--------------|------------|------------|--------------|

*Notes: ICD-10 codes I00-I99. Directly standardised using the 2013 European Standard Population.*

*Source: England and Wales: rates calculated in partnership with the Office for National Statistics; Scotland: Rates calculated in partnership with the General Register Office for Scotland; Northern Ireland: Rates calculated in partnership with Northern Ireland Statistics and Research Agency.*

Table 4 Numbers of deaths and age-standardised death rates from coronary heart disease (CHD) in men and women, all ages and under 75, by government office region, United Kingdom 2010/12

|                          | All ages                             |               |               |                                                     |               |               | Under 75                             |              |              |                                                     |              |               |
|--------------------------|--------------------------------------|---------------|---------------|-----------------------------------------------------|---------------|---------------|--------------------------------------|--------------|--------------|-----------------------------------------------------|--------------|---------------|
|                          | Age-standardised death rates/100,000 |               |               | Average numbers of CHD deaths per year 2010 to 2012 |               |               | Age-standardised death rates/100,000 |              |              | Average numbers of CHD deaths per year 2010 to 2012 |              |               |
|                          | Men                                  | Women         | Both          | Men                                                 | Women         | Both          | Men                                  | Women        | Both         | Men                                                 | Women        | Both          |
| <b>UK</b>                | <b>189.90</b>                        | <b>93.90</b>  | <b>135.60</b> | <b>44,049</b>                                       | <b>31,823</b> | <b>75,872</b> | <b>66.67</b>                         | <b>21.06</b> | <b>43.15</b> | <b>17,978</b>                                       | <b>5,966</b> | <b>23,945</b> |
| <b>ENGLAND</b>           | <b>184.06</b>                        | <b>90.27</b>  | <b>131.10</b> | <b>35,864</b>                                       | <b>25,702</b> | <b>61,567</b> | <b>63.88</b>                         | <b>19.80</b> | <b>41.19</b> | <b>14,359</b>                                       | <b>4,658</b> | <b>19,016</b> |
| North East               | 195.57                               | 96.26         | 139.52        | 1,957                                               | 1,371         | 3,328         | 73.46                                | 23.29        | 47.55        | 869                                                 | 291          | 1,160         |
| Yorkshire and The Humber | 210.17                               | 105.45        | 150.87        | 4,072                                               | 2,978         | 7,049         | 74.36                                | 23.67        | 48.30        | 1,703                                               | 568          | 2,271         |
| North West               | 212.01                               | 108.41        | 153.40        | 5,474                                               | 4,039         | 9,513         | 77.69                                | 26.18        | 51.22        | 2,401                                               | 847          | 3,248         |
| East Midlands            | 192.63                               | 93.83         | 137.53        | 3,367                                               | 2,309         | 5,677         | 67.20                                | 20.39        | 43.35        | 1,381                                               | 428          | 1,809         |
| West Midlands            | 190.35                               | 87.57         | 132.48        | 3,993                                               | 2,652         | 6,645         | 68.98                                | 20.44        | 44.14        | 1,687                                               | 519          | 2,206         |
| East of England          | 172.77                               | 88.38         | 125.20        | 3,994                                               | 2,999         | 6,993         | 55.37                                | 17.78        | 36.05        | 1,440                                               | 484          | 1,924         |
| South East               | 161.39                               | 77.91         | 114.02        | 5,422                                               | 3,987         | 9,409         | 51.90                                | 15.23        | 32.99        | 1,948                                               | 598          | 2,547         |
| London                   | 172.99                               | 84.54         | 123.01        | 3,673                                               | 2,546         | 6,220         | 63.55                                | 19.67        | 40.53        | 1,582                                               | 519          | 2,102         |
| South West               | 167.61                               | 78.89         | 117.17        | 3,911                                               | 2,821         | 6,732         | 53.25                                | 15.09        | 33.61        | 1,348                                               | 403          | 1,750         |
| <b>WALES</b>             | <b>210.55</b>                        | <b>103.82</b> | <b>150.08</b> | <b>2,597</b>                                        | <b>1,878</b>  | <b>4,476</b>  | <b>71.94</b>                         | <b>24.44</b> | <b>47.54</b> | <b>1,031</b>                                        | <b>368</b>   | <b>1,399</b>  |
| <b>SCOTLAND</b>          | <b>228.58</b>                        | <b>119.73</b> | <b>166.33</b> | <b>4,392</b>                                        | <b>3,379</b>  | <b>7,772</b>  | <b>87.80</b>                         | <b>30.13</b> | <b>57.56</b> | <b>2,056</b>                                        | <b>768</b>   | <b>2,823</b>  |

|                         |               |               |               |              |            |              |              |              |              |            |            |            |
|-------------------------|---------------|---------------|---------------|--------------|------------|--------------|--------------|--------------|--------------|------------|------------|------------|
| <b>NORTHERN IRELAND</b> | <b>214.90</b> | <b>104.69</b> | <b>151.20</b> | <b>1,195</b> | <b>863</b> | <b>2,058</b> | <b>74.87</b> | <b>22.88</b> | <b>47.90</b> | <b>533</b> | <b>173</b> | <b>706</b> |
|-------------------------|---------------|---------------|---------------|--------------|------------|--------------|--------------|--------------|--------------|------------|------------|------------|

*Notes: ICD-10 codes I20-I25. Directly standardised using the 2013 European Standard Population.*

*Source: England and Wales: rates calculated in partnership with the Office for National Statistics; Scotland: Rates calculated in partnership with the General Register Office for Scotland; Northern Ireland: Rates calculated in partnership with Northern Ireland Statistics and Research Agency.*

Table 5 Numbers of deaths and age-standardised death rates from stroke in men and women, all ages and under 75, by government office region, United Kingdom 2010/12

|                                 | All ages                             |              |               |                                                        |               |               | Under 75                             |              |              |                                                        |              |              |
|---------------------------------|--------------------------------------|--------------|---------------|--------------------------------------------------------|---------------|---------------|--------------------------------------|--------------|--------------|--------------------------------------------------------|--------------|--------------|
|                                 | Age-standardised death rates/100,000 |              |               | Average numbers of Stroke deaths per year 2010 to 2012 |               |               | Age-standardised death rates/100,000 |              |              | Average numbers of Stroke deaths per year 2010 to 2012 |              |              |
|                                 | Men                                  | Women        | Both          | Men                                                    | Women         | Both          | Men                                  | Women        | Both         | Men                                                    | Women        | Both         |
| <b>UK</b>                       | <b>78.57</b>                         | <b>77.05</b> | <b>78.44</b>  | <b>17,292</b>                                          | <b>26,776</b> | <b>44,069</b> | <b>16.66</b>                         | <b>12.48</b> | <b>13.88</b> | <b>4,425</b>                                           | <b>3,545</b> | <b>6,353</b> |
| <b>ENGLAND</b>                  | <b>76.12</b>                         | <b>74.49</b> | <b>75.87</b>  | <b>14,117</b>                                          | <b>21,757</b> | <b>35,874</b> | <b>15.98</b>                         | <b>11.92</b> | <b>13.88</b> | <b>3,540</b>                                           | <b>2,813</b> | <b>6,353</b> |
| <b>North East</b>               | 83.74                                | 79.70        | 82.09         | 781                                                    | 1,155         | 1,936         | 19.32                                | 14.03        | 16.57        | 225                                                    | 175          | 400          |
| <b>Yorkshire and The Humber</b> | 84.37                                | 79.66        | 82.29         | 1,534                                                  | 2,303         | 3,837         | 18.29                                | 13.18        | 15.63        | 407                                                    | 316          | 723          |
| <b>North West</b>               | 83.32                                | 81.36        | 82.93         | 2,022                                                  | 3,090         | 5,112         | 19.43                                | 15.56        | 17.42        | 591                                                    | 504          | 1,095        |
| <b>East Midlands</b>            | 72.70                                | 72.14        | 72.87         | 1,194                                                  | 1,813         | 3,007         | 14.71                                | 11.81        | 13.23        | 296                                                    | 249          | 545          |
| <b>West Midlands</b>            | 80.86                                | 79.26        | 80.53         | 1,587                                                  | 2,461         | 4,048         | 15.82                                | 12.40        | 14.07        | 382                                                    | 314          | 697          |
| <b>East of England</b>          | 70.31                                | 69.18        | 70.21         | 1,565                                                  | 2,406         | 3,971         | 13.84                                | 10.13        | 11.92        | 356                                                    | 276          | 632          |
| <b>South East</b>               | 70.45                                | 71.91        | 72.18         | 2,289                                                  | 3,787         | 6,075         | 13.69                                | 10.09        | 11.83        | 508                                                    | 397          | 905          |
| <b>London</b>                   | 70.46                                | 62.38        | 66.25         | 1,440                                                  | 1,919         | 3,359         | 17.85                                | 11.96        | 14.75        | 447                                                    | 328          | 775          |
| <b>South West</b>               | 75.22                                | 76.36        | 76.72         | 1,706                                                  | 2,823         | 4,529         | 13.13                                | 9.51         | 11.26        | 329                                                    | 252          | 581          |
| <b>WALES</b>                    | <b>81.90</b>                         | <b>80.20</b> | <b>81.73</b>  | <b>963</b>                                             | <b>1,486</b>  | <b>2,449</b>  | <b>17.94</b>                         | <b>14.40</b> | <b>16.12</b> | <b>254</b>                                             | <b>216</b>   | <b>470</b>   |
| <b>SCOTLAND</b>                 | <b>100.56</b>                        | <b>98.52</b> | <b>100.57</b> | <b>1,781</b>                                           | <b>2,830</b>  | <b>4,611</b>  | <b>22.22</b>                         | <b>16.41</b> | <b>19.16</b> | <b>508</b>                                             | <b>418</b>   | <b>926</b>   |

|                         |              |              |              |            |            |              |              |              |              |            |           |            |
|-------------------------|--------------|--------------|--------------|------------|------------|--------------|--------------|--------------|--------------|------------|-----------|------------|
| <b>NORTHERN IRELAND</b> | <b>83.63</b> | <b>84.26</b> | <b>85.23</b> | <b>432</b> | <b>704</b> | <b>1,135</b> | <b>17.66</b> | <b>13.00</b> | <b>15.24</b> | <b>124</b> | <b>98</b> | <b>222</b> |
|-------------------------|--------------|--------------|--------------|------------|------------|--------------|--------------|--------------|--------------|------------|-----------|------------|

*Notes: ICD-10 codes I20-I25. Directly standardised using the 2013 European Standard Population.*

*Source: England and Wales: rates calculated in partnership with the Office for National Statistics; Scotland: Rates calculated in partnership with the General Register Office for Scotland; Northern Ireland: Rates calculated in partnership with Northern Ireland Statistics and Research Agency.*

Table 6 Rankings for ten local authorities with highest coronary heart disease mortality rates and ten local authorities with the lowest coronary heart disease mortality rates, United Kingdom 2010/2012

| All ages                      |                          |                        |                                         | Under 75                      |                             |                  |                                         |
|-------------------------------|--------------------------|------------------------|-----------------------------------------|-------------------------------|-----------------------------|------------------|-----------------------------------------|
| Code                          | Local authority          | Region                 | Age-standardised death rate per 100,000 | Code                          | Local authority             | Region           | Age-standardised death rate per 100,000 |
| <b>10 HIGHEST DEATH RATES</b> |                          |                        |                                         | <b>10 HIGHEST DEATH RATES</b> |                             |                  |                                         |
| 00BT                          | Tameside                 | North West             | 235.07                                  | 00QS                          | Glasgow City                | Scotland         | 85.56                                   |
| 30UG                          | Hyndburn                 | North West             | 217.56                                  | 00BN                          | Manchester                  | North West       | 74.82                                   |
| 00EX                          | Blackburn with Darwen UA | North West             | 215.29                                  | 00QG                          | West Dunbartonshire         | Scotland         | 74.04                                   |
| 00QS                          | Glasgow City             | Scotland               | 198.34                                  | 00QJ                          | Dundee City                 | Scotland         | 73.76                                   |
| 30UD                          | Burnley                  | North West             | 198.07                                  | 00BT                          | Tameside                    | North West       | 72.78                                   |
| 00QG                          | West Dunbartonshire      | Scotland               | 195.32                                  | 00EX                          | Blackburn with Darwen UA    | North West       | 71.73                                   |
| 00RJ                          | Eilean Siar              | Scotland               | 189.44                                  | 00QZ                          | North Lanarkshire           | Scotland         | 71.40                                   |
| 95N                           | Craigavon                | Northern Ireland       | 189.06                                  | 30UD                          | Burnley                     | North West       | 69.79                                   |
| 00QZ                          | North Lanarkshire        | Scotland               | 186.67                                  | 00EY                          | Blackpool UA                | North West       | 69.08                                   |
| 95M                           | Dungannon                | Scotland               | 186.31                                  | 00KA                          | Luton UA                    | East of England  | 68.21                                   |
| <b>MIDDLE TWO DEATH RATES</b> |                          |                        |                                         | <b>MIDDLE TWO DEATH RATES</b> |                             |                  |                                         |
| 00KB                          | Bedford UA               | East of England        | 131.59                                  | 00GA                          | Herefordshire, County of UA | West Midlands    | 40.59                                   |
| 36UH                          | Selby                    | Yorkshire & The Humber | 131.35                                  | 95C                           | Coleraine                   | Northern Ireland | 40.55                                   |
| <b>10 LOWEST DEATH RATES</b>  |                          |                        |                                         | <b>10 LOWEST DEATH RATES</b>  |                             |                  |                                         |
| 00BK                          | Westminster              | London                 | 94.51                                   | 22UQ                          | Uttlesford                  | East of England  | 23.16                                   |
| 38UD                          | South Oxfordshire        | South East             | 94.42                                   | 45UF                          | Horsham                     | South East       | 23.10                                   |
| 00BD                          | Richmond upon Thames     | London                 | 93.65                                   | 43UE                          | Mole Valley                 | South East       | 23.09                                   |
| 43UK                          | Tandridge                | South East             | 91.79                                   | 43UL                          | Waverley                    | South East       | 22.82                                   |
| 12UG                          | South Cambridgeshire     | East of England        | 90.54                                   | 11UE                          | South Bucks                 | South East       | 22.56                                   |
| 29UK                          | Sevenoaks                | South East             | 89.48                                   | 21UF                          | Lewes                       | South East       | 22.29                                   |



|             |                        |            |       |      |                        |            |       |
|-------------|------------------------|------------|-------|------|------------------------|------------|-------|
| <b>24UG</b> | Hart                   | South East | 86.51 | 24UC | East Hampshire         | South East | 20.94 |
| <b>00HF</b> | Isles of Scilly UA     | South West | 74.83 | 00AW | Kensington and Chelsea | London     | 20.54 |
| <b>00AW</b> | Kensington and Chelsea | London     | 73.55 | 24UG | Hart                   | South East | 17.13 |
| <b>00AA</b> | City of London         | London     | 71.97 | 00HF | Isles of Scilly UA     | South West | 0.00  |

*Source: England and Wales: rates calculated in partnership with the Office for National Statistics; Scotland: Rates calculated in partnership with the General Register Office for Scotland; Northern Ireland: Rates calculated in partnership with Northern Ireland Statistics and Research Agency.*

Table 7 Rankings for ten local authorities with highest stroke mortality rates and ten local authorities with the lowest stroke mortality rates, United Kingdom 2010/2012

| Code                          | Local authority        | Region                 | Age-standardised death rate per 100,000 | Code                          | Local authority          | Region           | Age-standardised death rate per 100,000 |
|-------------------------------|------------------------|------------------------|-----------------------------------------|-------------------------------|--------------------------|------------------|-----------------------------------------|
| <b>10 HIGHEST DEATH RATES</b> |                        |                        |                                         | <b>10 HIGHEST DEATH RATES</b> |                          |                  |                                         |
| 95G                           | Ballymena              | Northern Ireland       | 139.73                                  | 00QU                          | Inverclyde               | Scotland         | 31.22                                   |
| 95I                           | Cookstown              | Northern Ireland       | 139.73                                  | 00QS                          | Glasgow City             | Scotland         | 27.09                                   |
| 00RC                          | Renfrewshire           | Scotland               | 135.87                                  | 00BN                          | Manchester               | North West       | 26.88                                   |
| 00QU                          | Inverclyde             | Scotland               | 122.58                                  | 00RC                          | Renfrewshire             | Scotland         | 26.63                                   |
| 36UG                          | Scarborough            | Yorkshire & The Humber | 120.05                                  | 95I                           | Cookstown                | Northern Ireland | 24.99                                   |
| 00RA                          | Orkney Islands         | Scotland               | 117.65                                  | 00RJ                          | Eilean Siar              | Scotland         | 24.94                                   |
| 00QS                          | Glasgow City           | Scotland               | 114.74                                  | 00EY                          | Blackpool UA             | North West       | 23.90                                   |
| 95B                           | Limavady               | Northern Ireland       | 114.40                                  | 00EX                          | Blackburn with Darwen UA | North West       | 23.83                                   |
| 00QG                          | West Dunbartonshire    | Scotland               | 111.34                                  | 00QZ                          | North Lanarkshire        | Scotland         | 23.68                                   |
| 00QQ                          | Falkirk                | Scotland               | 109.99                                  | 34UB                          | Corby                    | Northern Ireland | 23.09                                   |
| <b>MIDDLE TWO DEATH RATES</b> |                        |                        |                                         | <b>MIDDLE TWO DEATH RATES</b> |                          |                  |                                         |
| 00CU                          | Walsall                | West Midlands          | 76.46                                   | 29UB                          | Ashford                  | South East       | 13.47                                   |
| 40UC                          | Sedgemoor              | South West             | 76.43                                   | 00FK                          | Derby UA                 | East Midlands    | 13.45                                   |
| <b>10 LOWEST DEATH RATES</b>  |                        |                        |                                         | <b>10 LOWEST DEATH RATES</b>  |                          |                  |                                         |
| 95E                           | Moyle                  | Northern Ireland       | 57.44                                   | 24UP                          | Winchester               | South East       | 7.48                                    |
| 43UD                          | Guildford              | South East             | 56.39                                   | 23UF                          | Stroud                   | South West       | 7.12                                    |
| 00BD                          | Richmond upon Thames   | London                 | 55.15                                   | 22UE                          | Castle Point             | East of England  | 6.98                                    |
| 42UB                          | Babergh                | East of England        | 53.17                                   | 17UF                          | Derbyshire Dales         | East Midlands    | 6.79                                    |
| 00AW                          | Kensington and Chelsea | London                 | 53.03                                   | 19UG                          | Purbeck                  | South West       | 6.31                                    |
| 00BK                          | Westminster            | London                 | 53.00                                   | 95K                           | Omagh                    | Northern Ireland | 6.20                                    |
| 00AG                          | Camden                 | London                 | 52.37                                   | 24UN                          | Test Valley              | South East       | 6.17                                    |

|             |                    |            |       |      |                    |                 |      |
|-------------|--------------------|------------|-------|------|--------------------|-----------------|------|
| <b>00AQ</b> | Harrow             | London     | 52.30 | 24UG | Hart               | South East      | 6.05 |
| <b>00HF</b> | Isles of Scilly UA | South West | 42.86 | 26UJ | Three Rivers       | East of England | 6.03 |
| <b>00AA</b> | City of London     | London     | 40.83 | 00HF | Isles of Scilly UA | South West      | 0.00 |

*Source: England and Wales: rates calculated in partnership with the Office for National Statistics; Scotland: Rates calculated in partnership with the General Register Office for Scotland; Northern Ireland: Rates calculated in partnership with Northern Ireland Statistics and Research Agency.*

Table 8 Prevalence of selected cardiovascular conditions by Government Office Region and country, United Kingdom 2012/13

| Country / Government Office Region (GOR) | Population        | Coronary Heart Disease Register |            | Stroke or Transient Ischaemic Attacks (TIA) Register |            | Hypertension Register |             | Heart Failure Register |            | Atrial Fibrillation Register |            | Peripheral Arterial Disease (PAD) Register |            |
|------------------------------------------|-------------------|---------------------------------|------------|------------------------------------------------------|------------|-----------------------|-------------|------------------------|------------|------------------------------|------------|--------------------------------------------|------------|
|                                          |                   | n                               | %          | n                                                    | %          | %                     | n           | %                      | n          | %                            | n          | %                                          |            |
| East Midlands                            | 4,735,883         | 170,392                         | 3.6        | 84,601                                               | 1.8        | 676,809               | 14.3        | 37,662                 | 0.8        | 75,494                       | 1.6        | 30,443                                     | 0.6        |
| East of England                          | 6,113,986         | 199,093                         | 3.3        | 101,965                                              | 1.7        | 859,211               | 14.1        | 44,340                 | 0.7        | 98,755                       | 1.6        | 34,950                                     | 0.6        |
| London                                   | 9,056,401         | 193,614                         | 2.1        | 94,989                                               | 1.0        | 999,576               | 11.0        | 44,179                 | 0.5        | 80,989                       | 0.9        | 35,140                                     | 0.4        |
| North East                               | 2,696,547         | 121,807                         | 4.5        | 57,845                                               | 2.1        | 418,078               | 15.5        | 23,603                 | 0.9        | 45,050                       | 1.7        | 26,520                                     | 1.0        |
| North West                               | 7,397,503         | 292,461                         | 4.0        | 139,228                                              | 1.9        | 1,051,020             | 14.2        | 62,564                 | 0.8        | 117,998                      | 1.6        | 65,560                                     | 0.9        |
| South East                               | 9,074,471         | 275,806                         | 3.0        | 150,792                                              | 1.7        | 1,213,525             | 13.4        | 55,659                 | 0.6        | 147,135                      | 1.6        | 51,394                                     | 0.6        |
| South West                               | 5,536,574         | 196,447                         | 3.5        | 112,083                                              | 2.0        | 801,615               | 14.5        | 42,997                 | 0.8        | 105,323                      | 1.9        | 37,902                                     | 0.7        |
| West Midlands                            | 5,880,643         | 202,258                         | 3.4        | 104,690                                              | 1.8        | 864,902               | 14.7        | 44,561                 | 0.8        | 90,844                       | 1.5        | 39,829                                     | 0.7        |
| Yorkshire and The Humber                 | 5,524,195         | 218,663                         | 4.0        | 105,366                                              | 1.9        | 775,989               | 14.0        | 42,028                 | 0.8        | 87,908                       | 1.6        | 43,682                                     | 0.8        |
|                                          |                   |                                 |            |                                                      |            |                       |             |                        |            |                              |            |                                            |            |
| England                                  | 56,016,203        | 1,870,541                       | 3.4        | 951,559                                              | 1.7        | 7,660,725             | 13.7        | 397,593                | 0.7        | 849,496                      | 1.5        | 365,420                                    | 0.7        |
| Scotland                                 | 5,552,133         | 236,466                         | 4.3        | 116,879                                              | 2.1        | 760,317               | 13.7        | 45,074                 | 0.8        | 84,250                       | 1.5        | 48,521                                     | 0.9        |
| Wales                                    | 3,180,153         | 125,421                         | 3.9        | 63,634                                               | 2.0        | 493,266               | 15.5        | 29,613                 | 0.9        | 58,698                       | 1.8        | 22,912                                     | 0.7        |
| Northern Ireland                         | 1,909,338         | 74,648                          | 3.9        | 33,470                                               | 1.8        | 245,730               | 12.9        | 14,400                 | 0.8        | 27,756                       | 1.5        | 13,802                                     | 0.7        |
|                                          |                   |                                 |            |                                                      |            |                       |             |                        |            |                              |            |                                            |            |
| <b>UK</b>                                | <b>66,657,827</b> | <b>2,307,076</b>                | <b>3.5</b> | <b>1,165,542</b>                                     | <b>1.7</b> | <b>9,160,038</b>      | <b>13.7</b> | <b>486,680</b>         | <b>0.7</b> | <b>1,020,200</b>             | <b>1.5</b> | <b>450,655</b>                             | <b>0.7</b> |

Note: England - Copyright © Health and Social Care Information Centre 2014.

Source: England - Information Centre QOF achievement data 2012/13; Wales - StatsWales. QOF 20012/13 achievement data; Scotland - ISD Scotland. QOF achievement data 2013/13; Northern Ireland - Department of Health, Social Services and Public Safety. QOF achievement data 2012/13

Table 9 Prescriptions used in the prevention and treatment of cardiovascular disease, Wales 2005 to 2013

| Prescriptions                                                  | Thousands (000s) |               |               |               |               |               |               |               |               |
|----------------------------------------------------------------|------------------|---------------|---------------|---------------|---------------|---------------|---------------|---------------|---------------|
|                                                                | 2005             | 2006          | 2007          | 2008          | 2009          | 2010          | 2011          | 2012          | 2013          |
| Digoxin and other positive inotropic drugs (2.1)               | 362              | 357           | 337           | 319           | 307           | 296           | 284           | 273           | 259           |
| Diuretics (2.2)                                                | 3,083            | 3,091         | 3,028         | 3,000         | 2,979         | 2,971         | 2,960         | 2,940         | 2,897         |
| Anti-arrhythmic drugs (2.3)                                    | 99               | 94            | 87            | 81            | 75            | 68            | 64            | 62            | 60            |
| Beta-adrenoreceptor blocking drugs (2.4)                       | 2,093            | 2,110         | 2,071         | 2,116         | 2,165         | 2,237         | 2,322         | 2,424         | 2,505         |
| Antihypertensive and heart failure drugs (2.5)                 | 3,442            | 3,774         | 4,124         | 4,402         | 4,601         | 4,781         | 4,920         | 5,063         | 5,173         |
| Nitrates, calcium blockers & other antianginal drugs (2.6)     | 2,731            | 2,892         | 3,032         | 3,135         | 3,205         | 3,263         | 3,314         | 3,390         | 3,437         |
| Anticoagulants and protamine (2.8)                             | 576              | 612           | 650           | 689           | 723           | 764           | 808           | 874           | 944           |
| Antiplatelet drugs (2.9)                                       | 2,563            | 2,716         | 2,846         | 3,011         | 3,045         | 2,933         | 2,905         | 2,890         | 2,859         |
| Anti-fibrinolytic drugs and haemostatics (2.11)                | 23               | 24            | 28            | 30            | 30            | 31            | 33            | 34            | 33            |
| Lipid-lowering drugs (2.12)                                    | 3,103            | 3,626         | 3,985         | 4,297         | 4,562         | 4,693         | 4,788         | 4,956         | 5,076         |
| <b>All prescriptions for disease of the circulatory system</b> | <b>18,073</b>    | <b>19,296</b> | <b>20,188</b> | <b>21,082</b> | <b>21,691</b> | <b>22,037</b> | <b>22,399</b> | <b>22,906</b> | <b>23,247</b> |

Notes: British National Formulary (BNF) codes in parentheses.

Source: Health Statistics and Analysis Unit (2014). Prescription cost analysis 2013. Welsh Government: Cardiff and previous editions.

Table 10 Prescriptions used in the prevention and treatment of cardiovascular disease, Scotland 2001/02 to 2013/14

| Prescriptions                                                  | Thousands (000s) |               |               |               |               |               |               |               |               |               |
|----------------------------------------------------------------|------------------|---------------|---------------|---------------|---------------|---------------|---------------|---------------|---------------|---------------|
|                                                                | 2001/02          | 2005/06       | 2006/07       | 2007/08       | 2008/09       | 2009/10       | 2010/11       | 2011/12       | 2012/13       | 2013/14       |
| Digoxin and other positive inotropic drugs (2.1)               | 358              | 323           | 315           | 305           | 296           | 291           | 283           | 276           | 269           | 260           |
| Diuretics (2.2)                                                | 3,469            | 3,914         | 3,810         | 3,680         | 3,597         | 3,544         | 3,457         | 3,382         | 3,269         | 3,154         |
| Anti-arrhythmic drugs (2.3)                                    | 102              | 90            | 85            | 81            | 77            | 73            | 70            | 71            | 69            | 68            |
| Beta-adrenoreceptor blocking drugs (2.4)                       | 2,508            | 3,027         | 2,940         | 2,853         | 2,850         | 2,883         | 2,909         | 2,957         | 2,998         | 3,048         |
| Antihypertensive and heart failure drugs (2.5)                 | 2,298            | 3,777         | 4,127         | 4,462         | 4,693         | 4,875         | 4,965         | 5,045         | 5,095         | 5,160         |
| Nitrates, calcium blockers & other antianginal drugs (2.6)     | 3,278            | 3,542         | 3,625         | 3,666         | 3,683         | 3,714         | 3,697         | 3,699         | 3,716         | 3,735         |
| Anticoagulants and protamine (2.8)                             | 489              | 612           | 646           | 676           | 707           | 743           | 773           | 819           | 884           | 958           |
| Antiplatelet drugs (2.9)                                       | 2,461            | 3,448         | 3,545         | 3,652         | 3,743         | 3,724         | 3,577         | 3,506         | 3,404         | 3,295         |
| Anti-fibrinolytic drugs and haemostatics (2.11)                | 35               | 36            | 38            | 39            | 41            | 42            | 43            | 44            | 47            | 47            |
| Lipid-lowering drugs (2.12)                                    | 1,667            | 3,649         | 4,081         | 4,376         | 4,624         | 4,826         | 4,875         | 4,861         | 4,907         | 4,977         |
| <b>All prescriptions for disease of the circulatory system</b> | <b>16,667</b>    | <b>22,418</b> | <b>23,212</b> | <b>23,791</b> | <b>24,312</b> | <b>24,716</b> | <b>24,649</b> | <b>24,660</b> | <b>24,657</b> | <b>24,703</b> |

Notes: British National Formulary (BNF) codes in parentheses.

Source: ISD Scotland (2014). Prescription Cost Analysis 2013/14. NHS National Services: Edinburgh. and previous editions.

Table 11 Prescriptions used in the prevention and treatment of cardiovascular disease, Northern Ireland 2000 to 2013

| Prescriptions                                                  | Thousands (000s) |              |              |              |              |              |              |              |              |              |
|----------------------------------------------------------------|------------------|--------------|--------------|--------------|--------------|--------------|--------------|--------------|--------------|--------------|
|                                                                | 2000             | 2005         | 2006         | 2007         | 2008         | 2009         | 2010         | 2011         | 2012         | 2013         |
| Digoxin and other positive inotropic drugs (2.1)               | 132              | 107          | 104          | 101          | 99           | 96           | 95           | 93           | 92           | 90           |
| Diuretics (2.2)                                                | 819              | 1,015        | 1,009        | 992          | 983          | 983          | 992          | 1,002        | 996          | 978          |
| Anti-arrhythmic drugs (2.3)                                    | 41               | 38           | 36           | 35           | 34           | 32           | 31           | 32           | 31           | 30           |
| Beta-adrenoreceptor blocking drugs (2.4)                       | 641              | 908          | 918          | 915          | 937          | 967          | 1,020        | 1,059        | 1,108        | 1,150        |
| Antihypertensive and heart failure drugs (2.5)                 | 602              | 1,145        | 1,247        | 1,364        | 1,445        | 1,517        | 1,595        | 1,640        | 1,689        | 1,728        |
| Nitrates, calcium blockers & other antianginal drugs (2.6)     | 928              | 1,001        | 1,039        | 1,080        | 1,089        | 1,097        | 1,124        | 1,154        | 1,188        | 1,218        |
| Anticoagulants and protamine (2.8)                             | 138              | 183          | 194          | 207          | 220          | 233          | 249          | 274          | 300          | 334          |
| Antiplatelet drugs (2.9)                                       | 539              | 957          | 1,026        | 1,095        | 1,151        | 1,177        | 1,192        | 1,223        | 1,239        | 1,239        |
| Anti-fibrinolytic drugs and haemostatics (2.11)                | 0                | 12           | 12           | 13           | 13           | 14           | 14           | 16           | 17           | 16           |
| Lipid-lowering drugs (2.12)                                    | 9                | 1,047        | 1,227        | 1,393        | 1,534        | 1,652        | 1,761        | 1,838        | 1,901        | 1,954        |
| <b>All prescriptions for disease of the circulatory system</b> | <b>4,226</b>     | <b>6,413</b> | <b>6,812</b> | <b>7,195</b> | <b>7,505</b> | <b>7,769</b> | <b>8,073</b> | <b>8,331</b> | <b>8,560</b> | <b>8,736</b> |

Notes: British National Formulary (BNF) codes in parentheses.

Source: HSC (2014). Prescription Cost Analysis 2013. Business Services Organisation: Belfast.

Table 12 Number of CABGs and PCIs, United Kingdom 1977 to 2012

|      | Coronary artery<br>bypass surgery (CABG) | Percutaneous<br>coronary<br>interventions<br>(PCI) |
|------|------------------------------------------|----------------------------------------------------|
| 1977 | 2,297                                    |                                                    |
| 1978 | 2,653                                    |                                                    |
| 1979 | 2,918                                    |                                                    |
| 1980 | 4,057                                    |                                                    |
| 1981 | 5,130                                    |                                                    |
| 1982 | 6,008                                    |                                                    |
| 1983 | 8,332                                    |                                                    |
| 1984 | 9,433                                    |                                                    |
| 1985 | 10,667                                   |                                                    |
| 1986 | 10,767                                   |                                                    |
| 1987 | 11,521                                   |                                                    |
| 1988 | 11,113                                   |                                                    |
| 1989 | 12,648                                   |                                                    |
| 1990 | 14,431                                   |                                                    |
| 1991 | 15,659                                   | 9,933                                              |
| 1992 | 19,241                                   | 11,575                                             |
| 1993 | 21,031                                   | 12,937                                             |
| 1994 | 22,056                                   | 14,624                                             |
| 1995 | 22,475                                   | 17,344                                             |
| 1996 | 22,160                                   | 20,511                                             |
| 1997 | 25,639                                   | 22,902                                             |
| 1998 | 25,083                                   | 24,899                                             |
| 1999 | 24,733                                   | 28,133                                             |
| 2000 | 25,127                                   | 33,256                                             |
| 2001 | 24,663                                   | 38,992                                             |
| 2002 | 25,277                                   | 44,913                                             |
| 2003 | 25,461                                   | 53,261                                             |
| 2004 | 25,160                                   | 62,780                                             |
| 2005 | 23,412                                   | 70,142                                             |
| 2006 | 23,623                                   | 73,692                                             |
| 2007 | 25,372                                   | 77,373                                             |
| 2008 | 22,846                                   | 80,331                                             |
| 2009 | 19,766                                   | 83,130                                             |
| 2010 | 17,986                                   | 87,676                                             |
| 2011 | 17,751                                   | 88,692                                             |
| 2012 | 16,791                                   | 92,445                                             |

Notes: Operations performed in NHS hospitals and selected private hospitals are included.

Source: British Cardiovascular Intervention Society (2013). BCIS Audit returns . Personal communication. The Society for Cardiothoracic Surgery in Great Britain & Ireland (2014). <http://bluebook.scts.org/#ActivityRates>. Accessed in March 2014



Table 13 Number of carotid endarterectomy cases reported in Hospital Episodes Statistics, by audit reporting period, Strategic Health Authority and country, United Kingdom 2005 to 2012

|                          | Round 1 operations 1 <sup>st</sup><br>December 2005 to 31 <sup>st</sup><br>December 2007 | Round 2 operations 1 <sup>st</sup><br>January 2008 to 30 <sup>th</sup><br>September 2008 | Round 3 operations 1 <sup>st</sup><br>October 2009 to 30 <sup>th</sup><br>September 2011 | Round 4 operations 1 <sup>st</sup><br>October 2010 to 30 <sup>th</sup><br>September 2011 | Round 5 operations 1 <sup>st</sup><br>October 2011 to 30 <sup>th</sup><br>September 2012 |
|--------------------------|------------------------------------------------------------------------------------------|------------------------------------------------------------------------------------------|------------------------------------------------------------------------------------------|------------------------------------------------------------------------------------------|------------------------------------------------------------------------------------------|
| East Midlands            | 404                                                                                      | 477                                                                                      | 382                                                                                      | 405                                                                                      | 401                                                                                      |
| East of England          | 641                                                                                      | 477                                                                                      | 586                                                                                      | 556                                                                                      | 588                                                                                      |
| London                   | 918                                                                                      | 1017                                                                                     | 584                                                                                      | 597                                                                                      | 531                                                                                      |
| North East               | 545                                                                                      | 483                                                                                      | 265                                                                                      | 283                                                                                      | 292                                                                                      |
| North West               | 1,079                                                                                    | 1421                                                                                     | 1008                                                                                     | 1077                                                                                     | 1016                                                                                     |
| South Central            | 163                                                                                      | 649                                                                                      | 370                                                                                      | 392                                                                                      | 380                                                                                      |
| South East Coast         | 373                                                                                      | 579                                                                                      | 321                                                                                      | 358                                                                                      | 425                                                                                      |
| South West               | 1,047                                                                                    | 972                                                                                      | 584                                                                                      | 577                                                                                      | 587                                                                                      |
| West Midlands            | 985                                                                                      | 1032                                                                                     | 619                                                                                      | 602                                                                                      | 527                                                                                      |
| Yorkshire and The Humber | 901                                                                                      | 923                                                                                      | 538                                                                                      | 519                                                                                      | 599                                                                                      |
|                          |                                                                                          |                                                                                          |                                                                                          |                                                                                          |                                                                                          |
| <b>ENGLAND</b>           | <b>7,056</b>                                                                             | <b>8345</b>                                                                              | <b>5257</b>                                                                              | <b>5366</b>                                                                              | <b>5346</b>                                                                              |
| <b>NORTHERN IRELAND</b>  | <b>324</b>                                                                               | <b>252</b>                                                                               | <b>182</b>                                                                               | <b>154</b>                                                                               |                                                                                          |
| <b>SCOTLAND</b>          | <b>793</b>                                                                               | <b>822</b>                                                                               | <b>494</b>                                                                               | <b>395</b>                                                                               | <b>451</b>                                                                               |
| <b>WALES</b>             | <b>530</b>                                                                               | <b>601</b>                                                                               | <b>328</b>                                                                               | <b>362</b>                                                                               | <b>319</b>                                                                               |
|                          |                                                                                          |                                                                                          |                                                                                          |                                                                                          |                                                                                          |
| <b>UK TOTAL</b>          | <b>9,703</b>                                                                             | <b>10,020</b>                                                                            | <b>6,261</b>                                                                             | <b>6,277</b>                                                                             | <b>N/A</b>                                                                               |

Notes: Data were sourced by the Vascular Services Quality Improvement Programme to compare the completeness of audit data with cases reported in Hospital Episode Statistics (HES). Each Round refers to the UK carotid endarterectomy audit period. Audit data are less complete than HES and have not been included in this table.

Source: Waton S, Johal A, Groene O, Cromwell D, Mitchell D, Loftus I. UK Carotid Endarterectomy Audit. Round 5. London: The Royal College of Surgeons of England, October 2013.

Table 14 NHS expenditure in £millions on CVD by care setting and CVD type, England 2012/13

|                               | Prevention/Health Promotion | Primary care |                     |                    | Secondary care                  |                         |              |                      |                      |
|-------------------------------|-----------------------------|--------------|---------------------|--------------------|---------------------------------|-------------------------|--------------|----------------------|----------------------|
|                               |                             | Primary care | Primary prescribing | Total Primary Care | Inpatient: Elective and Daycase | Inpatient: Non-elective | Outpatient   | Other secondary care | Total Secondary Care |
| <b>Coronary heart disease</b> | 2.5                         | 5.4          | 574.1               | 579.5              | 246.1                           | 527.6                   | 8.0          | 66.8                 | 848.5                |
| <b>Stroke</b>                 | 0.7                         | 0.2          | 25.8                | 26.1               | 46.3                            | 444.1                   | 19.7         | 60.9                 | 571.0                |
| <b>Other CVD</b>              | 16.0                        | 47.8         | 787.6               | 835.4              | 556.3                           | 952.7                   | 520.8        | 923.9                | 2953.7               |
| <b>Total CVD</b>              | <b>19.2</b>                 | <b>53.5</b>  | <b>1387.5</b>       | <b>1441.0</b>      | <b>848.6</b>                    | <b>1924.5</b>           | <b>548.6</b> | <b>1051.5</b>        | <b>4373.2</b>        |

|                               | Urgent / emergency care |                      | Community Care | Care provided in other setting | Administration, facilities & estates | Total expenditure |
|-------------------------------|-------------------------|----------------------|----------------|--------------------------------|--------------------------------------|-------------------|
|                               | Ambulance               | Accident & Emergency |                |                                |                                      |                   |
| <b>Coronary heart disease</b> | 33.0                    | 0.0                  | 60.6           | 18.5                           | 55.2                                 | <b>1597.9</b>     |
| <b>Stroke</b>                 | 61.6                    | 16.3                 | 80.6           | 34.9                           | 27.9                                 | <b>819.1</b>      |
| <b>Other CVD</b>              | 224.6                   | 73.0                 | 167.4          | 55.1                           | 155.0                                | <b>4480.3</b>     |
| <b>Total CVD</b>              | <b>319.2</b>            | <b>89.4</b>          | <b>308.6</b>   | <b>108.5</b>                   | <b>238.1</b>                         | <b>6897.2</b>     |

Notes: Expenditure data included within this table are taken from the 2012-13 programme budgeting returns. Programme budgeting returns are based on a subset of PCT accounts data and represent a subset of overall NHS expenditure data. Estimates of expenditure are calculated using price paid for specific activities and services purchased from healthcare providers. PCTs follow standard guidance, procedures and mappings when calculating programme budgeting data. The analysis of programme budgeting data by care setting was introduced for the first time in 2010/11. For this reason, programme budgeting data within individual care settings should be interpreted with caution. The allocation of expenditure to programme budgeting subcategories is not always straightforward, and subcategory level data should therefore be used with caution. Due to differences in the level of information available to PCTs on A&E attendances a national split has been applied to PCT total A&E expenditure to apportion it across programme budgeting categories. When converting A&E diagnosis codes to Programme Budgeting subcategories of disease, no codes are included in CHD, with MI and other CHD included in Other CVD, resulting in no A&E spend for CHD.

Source: NHS England - Analytical services - Programme Budgeting Team (2014) 2012/13 Programme Budgeting Benchmarking Tool. <http://www.england.nhs.uk/resources/resources-for-cgs/prog-budgeting/> (accessed February 2014).

Table 15 NHS expenditure on CVD by Health Board, Wales 2012/13

| HSC Trust Name                    | Expenditure per head / £ |              |              |               | Total expenditure (£ millions) |             |              |              |
|-----------------------------------|--------------------------|--------------|--------------|---------------|--------------------------------|-------------|--------------|--------------|
|                                   | CHD                      | Stroke       | Other CVD    | Total CVD     | CHD                            | Stroke      | Other CVD    | Total CVD    |
| <b>Abertawe Bro Morgannwg UHB</b> | 43.87                    | 26.69        | 72.16        | 142.72        | 22.8                           | 13.9        | 37.5         | 74.1         |
| <b>Aneurin Bevan LHB</b>          | 40.58                    | 19.61        | 76.69        | 136.89        | 23.5                           | 11.3        | 44.3         | 79.1         |
| <b>Betsi Cadwaladr UHB</b>        | 41.68                    | 28.80        | 85.36        | 155.84        | 28.8                           | 19.9        | 58.9         | 107.6        |
| <b>Cardiff &amp; Vale UHB</b>     | 34.15                    | 19.65        | 57.69        | 111.49        | 16.2                           | 9.3         | 27.4         | 53.0         |
| <b>Cwm Taf LHB</b>                | 43.60                    | 27.61        | 82.82        | 154.03        | 12.8                           | 8.1         | 24.4         | 45.4         |
| <b>Hywel Dda LHB</b>              | 47.19                    | 26.58        | 78.23        | 152.00        | 18.1                           | 10.2        | 30.0         | 58.3         |
| <b>Powys Teaching LHB</b>         | 47.11                    | 58.03        | 81.68        | 186.82        | 6.3                            | 7.7         | 10.9         | 24.8         |
| <b>Wales</b>                      | <b>41.79</b>             | <b>26.17</b> | <b>75.93</b> | <b>143.89</b> | <b>128.5</b>                   | <b>80.4</b> | <b>233.4</b> | <b>442.3</b> |

Notes: HBs allocate as much expenditure as they can, given the activity information available. The apportionment of the remainder means that some figures are approximate. HBs are commissioned on a 'host' authority basis and have not been recharged to HB area. Programme budget categories are defined by reference to ICD 10 codes. To calculate expenditure per head of population, the ONS revised mid-year population 2013 estimates were used.

Source: Financial Information Strategy, Public Health Wales (2014) Personal communication.

Table 16 NHS expenditure on CVD by Health and Social Care Trust, Northern Ireland 2012/13

| HSC Trust Name          | Expenditure per head of population /£ |              |               |               | CVD expenditure (£ millions) |             |              |              |
|-------------------------|---------------------------------------|--------------|---------------|---------------|------------------------------|-------------|--------------|--------------|
|                         | CHD                                   | Stroke       | Other CVD     | Total CVD     | CHD                          | Stroke      | Other CVD    | Total CVD    |
| <b>Belfast</b>          | 163.67                                | 22.68        | 246.95        | 433.31        | 57.0                         | 7.9         | 86.0         | 150.9        |
| <b>Northern</b>         | 48.76                                 | 9.02         | 66.81         | 124.59        | 22.7                         | 4.2         | 31.1         | 58.0         |
| <b>Southern</b>         | 71.12                                 | 11.71        | 90.26         | 173.09        | 24.9                         | 4.1         | 31.6         | 60.6         |
| <b>South Eastern</b>    | 65.26                                 | 9.64         | 116.76        | 191.66        | 23.7                         | 3.5         | 42.4         | 69.6         |
| <b>Western</b>          | 65.41                                 | 13.15        | 103.17        | 181.72        | 19.4                         | 3.9         | 30.6         | 53.9         |
| <b>Northern Ireland</b> | <b>80.99</b>                          | <b>12.94</b> | <b>121.57</b> | <b>215.50</b> | <b>147.7</b>                 | <b>23.6</b> | <b>221.7</b> | <b>393.0</b> |

Notes: Hospital Information Branch identifies finished consultant episodes where a patient was treated for a diagnosis of coronary heart disease, cardiovascular disease or stroke using the relevant ICD 10 codes. To this activity information, Finance Directorate has applied 2012/13. HRG reference costs derived from annual trust costing returns, in order to produce an estimate of the total cost. All costs relate only to inpatient and daycase admitted care. Substantial A&E, outpatient, primary care, community and personal social services may also be provided to patients. Costs for these services are not collected at the level of detail required to enable an estimate on what has been spent on individuals with specific diagnoses.

Source: Hospital Information Branch, Department of Health, Social Services and Public Safety, Northern Ireland Executive (2014) Personal communication.
